# Supplementary material for: Differential antiviral immunity to Japanese encephalitis virus in developing cortical organoids
Source: PubMed Central journal article supplement (PMC6006338; doi:10.1038/s41419-018-0763-y), 2018-06-18

# Supplemental Fig.2

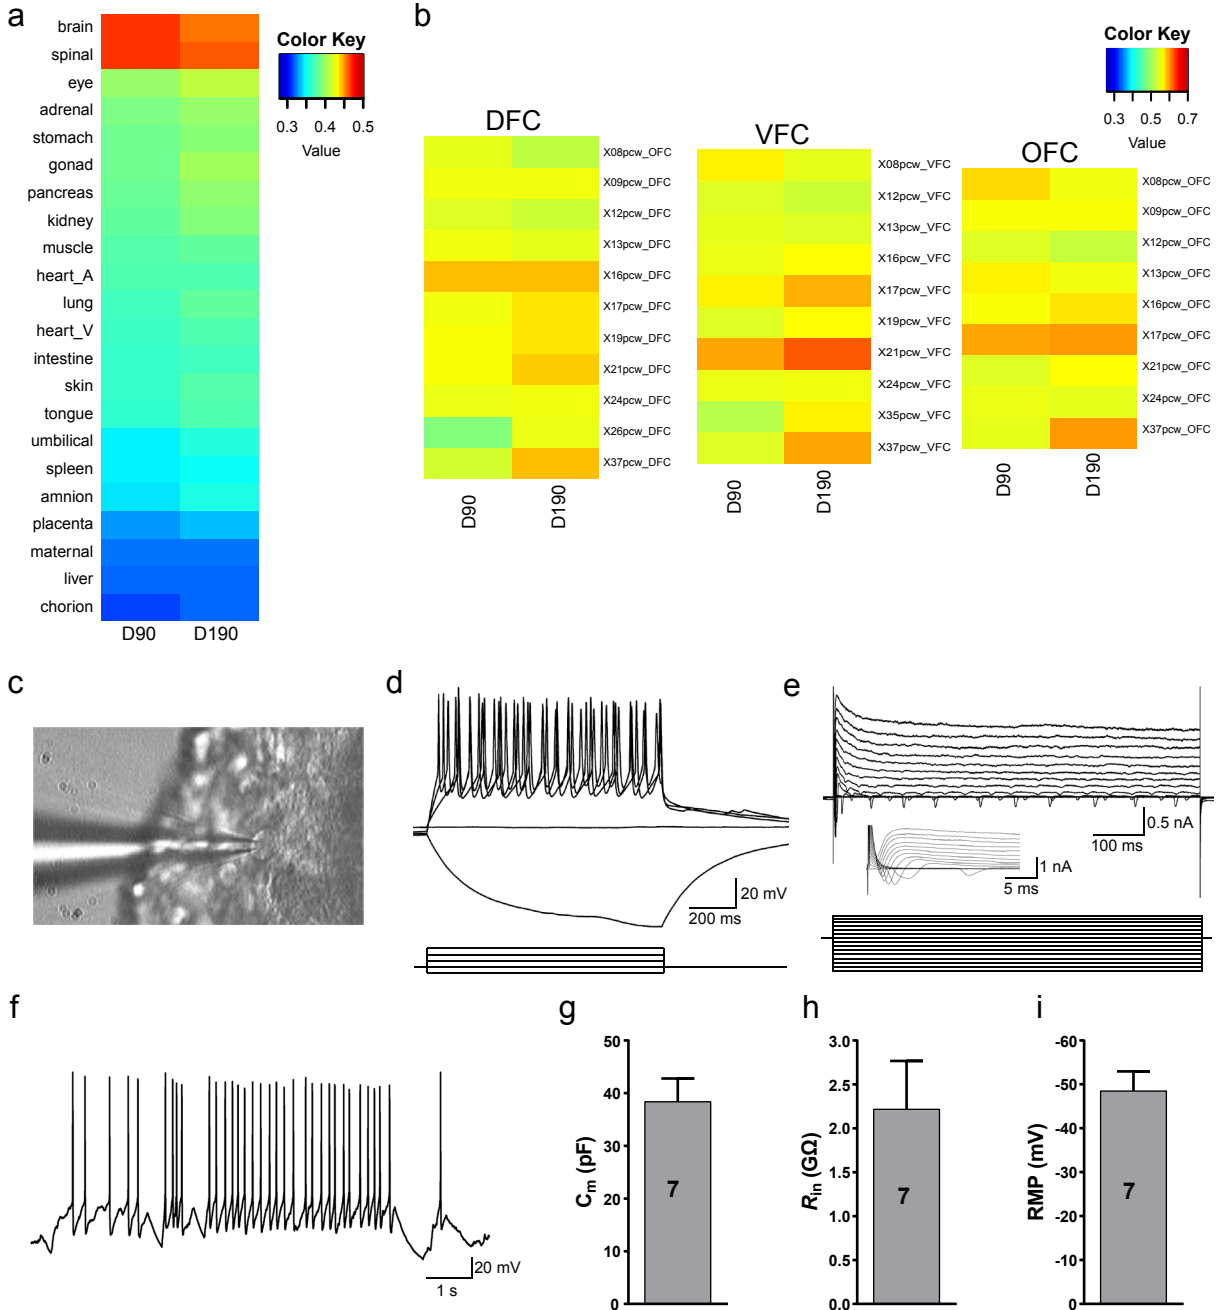

Supplement: 41419_2018_763_MOESM3_ESM.pdf [file 41419_2018_763_MOESM3_ESM.pdf]
